# Supplementary material for: The effect of physical fitness on psychological health: evidence from Chinese university students
Source: PubMed Central journal article supplement (PMC11106851; doi:10.1186/s12889-024-18841-y), 2024-05-21
Supplement: 12889_2024_18841_MOESM1_ESM.pdf [file 12889_2024_18841_MOESM1_ESM.pdf]

## SCL-90 (continued)

| <b>HOW MUCH WERE YOU BOTHERED BY:</b> |                                                                                 | NOT AT ALL | A LITTLE BIT | MODERATELY | QUITE A BIT | EXTREMELY |
|---------------------------------------|---------------------------------------------------------------------------------|------------|--------------|------------|-------------|-----------|
| 20.                                   | Crying easily                                                                   | 0          | 1            | 2          | 3           | 4         |
| 21.                                   | Feeling shy or uneasy with the opposite sex                                     | 0          | 1            | 2          | 3           | 4         |
| 22.                                   | Feeling of being trapped or caught                                              | 0          | 1            | 2          | 3           | 4         |
| 23.                                   | Suddenly scared for no reason                                                   | 0          | 1            | 2          | 3           | 4         |
| 24.                                   | Temper outbursts that you could not control                                     | 0          | 1            | 2          | 3           | 4         |
| 25.                                   | Feeling afraid to go out of your house alone                                    | 0          | 1            | 2          | 3           | 4         |
| 26.                                   | Blaming yourself for things                                                     | 0          | 1            | 2          | 3           | 4         |
| 27.                                   | Pains in lower back                                                             | 0          | 1            | 2          | 3           | 4         |
| 28.                                   | Feeling blocked in getting things done                                          | 0          | 1            | 2          | 3           | 4         |
| 29.                                   | Feeling lonely                                                                  | 0          | 1            | 2          | 3           | 4         |
| 30.                                   | Feeling blue                                                                    | 0          | 1            | 2          | 3           | 4         |
| 31.                                   | Worrying too much about things                                                  | 0          | 1            | 2          | 3           | 4         |
| 32.                                   | Feeling no interest in things                                                   | 0          | 1            | 2          | 3           | 4         |
| 33.                                   | Feeling fearful                                                                 | 0          | 1            | 2          | 3           | 4         |
| 34.                                   | Your feelings being easily hurt                                                 | 0          | 1            | 2          | 3           | 4         |
| 35.                                   | Other people being aware of your private thoughts                               | 0          | 1            | 2          | 3           | 4         |
| 36.                                   | Feeling others do not understand you or are unsympathetic                       | 0          | 1            | 2          | 3           | 4         |
| 37.                                   | Feeling that people are unfriendly or dislike you                               | 0          | 1            | 2          | 3           | 4         |
| 38.                                   | Having to do things very slowly to insure correctness                           | 0          | 1            | 2          | 3           | 4         |
| 39.                                   | Heart pounding or racing                                                        | 0          | 1            | 2          | 3           | 4         |
| 40.                                   | Nausea or upset stomach                                                         | 0          | 1            | 2          | 3           | 4         |
| 41.                                   | Feeling inferior to others                                                      | 0          | 1            | 2          | 3           | 4         |
| 42.                                   | Soreness of your muscles                                                        | 0          | 1            | 2          | 3           | 4         |
| 43.                                   | Feeling that you are watched or talked about by others                          | 0          | 1            | 2          | 3           | 4         |
| 44.                                   | Trouble falling asleep                                                          | 0          | 1            | 2          | 3           | 4         |
| 45.                                   | Having to check and double-check what you do                                    | 0          | 1            | 2          | 3           | 4         |
| 46.                                   | Difficulty making decisions                                                     | 0          | 1            | 2          | 3           | 4         |
| 47.                                   | Feeling afraid to travel on buses, subways, trains                              | 0          | 1            | 2          | 3           | 4         |
| 48.                                   | Trouble getting your breath                                                     | 0          | 1            | 2          | 3           | 4         |
| 49.                                   | Hot or cold spells                                                              | 0          | 1            | 2          | 3           | 4         |
| 50.                                   | Having to avoid certain things, places, or activities because they frighten you | 0          | 1            | 2          | 3           | 4         |
| 51.                                   | Your mind going blank                                                           | 0          | 1            | 2          | 3           | 4         |
| 52.                                   | Numbness or tingling in parts of your body                                      | 0          | 1            | 2          | 3           | 4         |
| 53.                                   | A lump in your throat                                                           | 0          | 1            | 2          | 3           | 4         |
| 54.                                   | Feeling hopeless about the future                                               | 0          | 1            | 2          | 3           | 4         |
| 55.                                   | Trouble concentrating                                                           | 0          | 1            | 2          | 3           | 4         |

## SCL-90 (continued)

| <b>HOW MUCH WERE YOU BOTHERED BY:</b> |                                                                       | NOT AT ALL | A LITTLE BIT | MODERATELY | QUITE A BIT | EXTREMELY |
|---------------------------------------|-----------------------------------------------------------------------|------------|--------------|------------|-------------|-----------|
| 56.                                   | Feeling weak in parts of your body                                    | 0          | 1            | 2          | 3           | 4         |
| 57.                                   | Feeling tense or keyed up                                             | 0          | 1            | 2          | 3           | 4         |
| 58.                                   | Heavy feelings in your arms or legs                                   | 0          | 1            | 2          | 3           | 4         |
| 59.                                   | Thoughts of death or dying                                            | 0          | 1            | 2          | 3           | 4         |
| 60.                                   | Overeating                                                            | 0          | 1            | 2          | 3           | 4         |
| 61.                                   | Feeling uneasy when people are watching or talking about you          | 0          | 1            | 2          | 3           | 4         |
| 62.                                   | Having thoughts that are not your own                                 | 0          | 1            | 2          | 3           | 4         |
| 63.                                   | Having urges to beat, injure, or harm someone                         | 0          | 1            | 2          | 3           | 4         |
| 64.                                   | Awakening in the early morning                                        | 0          | 1            | 2          | 3           | 4         |
| 65.                                   | Having to repeat the same actions such as touching, counting, washing | 0          | 1            | 2          | 3           | 4         |
| 66.                                   | Sleep that is restless or disturbed                                   | 0          | 1            | 2          | 3           | 4         |
| 67.                                   | Having urges to break or smash things                                 | 0          | 1            | 2          | 3           | 4         |
| 68.                                   | Having ideas or beliefs that others do not share                      | 0          | 1            | 2          | 3           | 4         |
| 69.                                   | Feeling very self-conscious with others                               | 0          | 1            | 2          | 3           | 4         |
| 70.                                   | Feeling uneasy in crowds, such as shopping or at a movie              | 0          | 1            | 2          | 3           | 4         |
| 71.                                   | Feeling everything is an effort                                       | 0          | 1            | 2          | 3           | 4         |
| 72.                                   | Spells of terror or panic                                             | 0          | 1            | 2          | 3           | 4         |
| 73.                                   | Feeling uncomfortable about eating or drinking in public              | 0          | 1            | 2          | 3           | 4         |
| 74.                                   | Getting into frequent arguments                                       | 0          | 1            | 2          | 3           | 4         |
| 75.                                   | Feeling nervous when you are left alone                               | 0          | 1            | 2          | 3           | 4         |
| 76.                                   | Others not giving you proper credit for your achievements             | 0          | 1            | 2          | 3           | 4         |
| 77.                                   | Feeling lonely even when you are with people                          | 0          | 1            | 2          | 3           | 4         |
| 78.                                   | Feeling so restless you couldn't sit still                            | 0          | 1            | 2          | 3           | 4         |
| 79.                                   | Feelings of worthlessness                                             | 0          | 1            | 2          | 3           | 4         |
| 80.                                   | Feeling that familiar things are strange or unreal                    | 0          | 1            | 2          | 3           | 4         |
| 81.                                   | Shouting or throwing things                                           | 0          | 1            | 2          | 3           | 4         |
| 82.                                   | Feeling afraid you will faint in public                               | 0          | 1            | 2          | 3           | 4         |
| 83.                                   | Feeling that people will take advantage of you if you let them        | 0          | 1            | 2          | 3           | 4         |
| 84.                                   | Having thoughts about sex that bother you a lot                       | 0          | 1            | 2          | 3           | 4         |
| 85.                                   | The idea that you should be punished for your sins                    | 0          | 1            | 2          | 3           | 4         |
| 86.                                   | Feeling pushed to get things done                                     | 0          | 1            | 2          | 3           | 4         |
| 87.                                   | The idea that something serious is wrong with your body               | 0          | 1            | 2          | 3           | 4         |
| 88.                                   | Never feeling close to another person                                 | 0          | 1            | 2          | 3           | 4         |
| 89.                                   | Feelings of guilt                                                     | 0          | 1            | 2          | 3           | 4         |
| 90.                                   | The idea that something is wrong with your mind                       | 0          | 1            | 2          | 3           | 4         |
